# Supplementary material
Source: PubMed Central journal article supplement (PMC3596963)
Supplement: supp_blood-2012-08-450916_blood-2012-08-450916-1.pdf [file supp_blood-2012-08-450916_blood-2012-08-450916-1.pdf]

**Supplemental Table 1.** Expression data of 547 transcripts consistently deregulated in *Hdac1*<sup>Δ/Δ</sup>;*Hdac2*<sup>Δ/+</sup> pre-leukemic thymocytes and tumors. Indicated are fold changes (FC) values in RNA levels of indicated transcripts in *Hdac1*<sup>Δ/Δ</sup>;*Hdac2*<sup>Δ/+</sup> lymphomas compared to wild type thymocytes.

**Supplemental Table 2.** Common Targeted Genes(CTGs) (De Jong et al. 2011) that show deregulated expression in *Hdac1*<sup>Δ/Δ</sup>;*Hdac2*<sup>Δ/+</sup> pre-leukemic thymocytes and tumors. CTGs are ranked according to the number of times (counts) that a gene was targeted by a retroviral insertion (De Jong et al. 2011).

**Supplemental Table 3.** Gene ID of transcripts commonly deregulated in *Hdac1*<sup>Δ/Δ</sup>;*Hdac2*<sup>+/Δ</sup>, *Hdac1*<sup>Δ/Δ</sup> and *Hdac1*<sup>Δ/Δ</sup>;*Hdac2*<sup>+/Δ</sup> lymphomas.

**Supplementary Table 1.** Deregulated transcripts in 1 and 3 week old *Hdac1Δ/Δ;Hdac2Δ/+* thymocytes and *Hdac1Δ/Δ;Hdac2Δ/+* lymphoma

| Symbol        | RefSeq_ID      | logFC wt vs lymphoma | adj.P.Val   |
|---------------|----------------|----------------------|-------------|
| Gm525         | NM_001033266.2 | 96.54925253          | 2.84E-06    |
| Ddc           |                | 44.04000132          | 6.42E-08    |
| Ddc           | NM_016672.3    | 35.93240336          | 2.65E-08    |
| Gm525         | NM_001033266.2 | 33.14844652          | 3.55E-09    |
| Stra8         | NM_009292.1    | 5.015000451          | 0.018457156 |
| Cacng4        | NM_019431.1    | 4.837170227          | 0.000612326 |
| Sh3gl3        | NM_017400.2    | 4.575282778          | 5.94E-07    |
| Rbfox3        | NM_001039167.1 | 4.476790573          | 4.04E-05    |
| Rbfox3        | NM_001039168.1 | 4.244831479          | 3.59E-05    |
| Slc6a13       | NM_144512.2    | 4.187409776          | 1.13E-05    |
| Epb4.1l5      | NM_145506.2    | 3.993392169          | 0.001620121 |
| Cd276         | NM_133983.3    | 3.956035374          | 1.49E-05    |
| Jdp2          | NM_030887.2    | 3.841963852          | 3.18E-06    |
| Preli2        | NM_029942.1    | 3.593340396          | 0.025890601 |
| Tro           | NM_001002272.2 | 3.580300991          | 0.019614954 |
| Epb4.1l5      | NM_145506.3    | 3.567420852          | 0.001123159 |
| Lpar2         | NM_020028.3    | 3.487778085          | 0.000173714 |
| 5730559C18Rik |                | 3.381768451          | 0.040133817 |
| Tro           | NM_001002272.2 | 3.374714572          | 0.017570953 |
| Mfap2         | NM_008546.2    | 3.365703042          | 0.028247993 |
| Wdr86         | NM_026621.1    | 3.293029345          | 0.000525288 |
| Tro           | NM_001002272.2 | 3.250569704          | 0.040618715 |
| 1110008L16F   | XM_126928.4    | 3.239076787          | 0.000136508 |
| Sdc1          | NM_011519.2    | 3.186263712          | 1.81E-05    |
| Aif1l         | NM_145144.1    | 3.128563074          | 6.97E-07    |
| Ldhd          | NM_027570.3    | 3.126732053          | 0.001355712 |
| Ephb2         | XM_204072.3    | 3.120573348          | 5.62E-06    |
| Jazf1         | NM_173406.2    | 3.029323518          | 4.64E-05    |
| Kcnab3        | NM_010599.3    | 3.02889007           | 7.56E-05    |
| Pdgfrb        | NM_008809.1    | 3.025051746          | 0.000273137 |
| Sdc1          | NM_011519.1    | 3.008436367          | 9.00E-06    |
| Rnd2          | NM_009708.1    | 2.904524471          | 0.005919195 |
| Sema6b        | XM_001004114.1 | 2.889667714          | 0.00379049  |
| Scn5a         | NM_021544.3    | 2.880488903          | 0.000797838 |
| Syne2         | NM_001005510.2 | 2.832655556          | 2.67E-05    |
| Sema4g        | NM_011976.1    | 2.791069962          | 2.32E-06    |
| Bsn           | NM_007567.2    | 2.785697634          | 0.000931492 |
| Sox12         | NM_011438.2    | 2.757922017          | 0.002579387 |
| 2010107G12Rik |                | 2.757461129          | 0.000807757 |
| H1f0          | NM_008197.3    | 2.742652625          | 1.81E-05    |
| Dorz1         |                | 2.671412717          | 0.000199131 |

|               |                |             |             |
|---------------|----------------|-------------|-------------|
| Zfhx3         | NM_007496.2    | 2.670418623 | 0.006137236 |
| Zfp365        | NM_178679.2    | 2.642504966 | 0.001128143 |
| Ttc26         | NM_153600.2    | 2.631064217 | 0.000322905 |
| Abhd14a       | NM_145919.1    | 2.612391507 | 0.00129276  |
| Gmnn          | NM_020567.1    | 2.568298549 | 7.89E-05    |
| Rem2          | NM_080726.3    | 2.510600358 | 0.002169129 |
| Wnt8b         | NM_011720.2    | 2.486619906 | 5.65E-05    |
| Serp2         | XM_894566.3    | 2.484530087 | 0.048775535 |
| 2010107G12    | NM_001025573.1 | 2.452045735 | 0.00118972  |
| Slc29a1       |                | 2.412191669 | 1.12E-05    |
| Kctd17        | NM_001081367.1 | 2.389305761 | 6.54E-05    |
| Ramp3         | NM_019511.1    | 2.370558963 | 0.006288021 |
| Wnt5b         | NM_009525.2    | 2.367642872 | 0.002886903 |
| Nphp4         | NM_153424.2    | 2.340201501 | 1.24E-07    |
| Spef1         | NM_027641.2    | 2.334575349 | 0.000210506 |
| Sox12         | NM_011438.2    | 2.311943899 | 0.002360491 |
| 8430427H17    | NM_001001986.1 | 2.309885312 | 0.0001176   |
| Cnnm1         | NM_031396.1    | 2.302843749 | 0.023079399 |
| 7-Sep         | NM_033144.1    | 2.292335197 | 0.000278585 |
| Ramp3         | NM_019511.1    | 2.280405944 | 0.026136053 |
| Reep1         | NM_178608.2    | 2.265024978 | 0.00643244  |
| Wdr67         | NM_001081396.1 | 2.261887018 | 1.16E-05    |
| Lama5         | NM_001081171.2 | 2.261605929 | 0.004856707 |
| Hlcs          | NM_139145.4    | 2.259034415 | 0.000263798 |
| Mcoln2        | NM_001005846.2 | 2.248318002 | 0.000299633 |
| Rilpl1        | NM_021430.2    | 2.247543908 | 0.000546043 |
| C430017H16    | XM_143616.3    | 2.246474677 | 0.000357029 |
| Pvrl2         | NM_008990.2    | 2.244663413 | 0.001524703 |
| Ramp3         | NM_019511.3    | 2.24056284  | 0.019791614 |
| Zfp704        | NM_133218.1    | 2.23420481  | 0.020828312 |
| Fgd1          | NM_008001.3    | 2.208909875 | 0.002944722 |
| Prickle1      | NM_001033217.3 | 2.198491872 | 0.000106679 |
| Zfp365        | XM_980150.1    | 2.193803383 | 0.001572303 |
| 3230401I01Rik |                | 2.18538419  | 0.002284046 |
| Lpar2         | NM_020028.3    | 2.158594953 | 0.019116488 |
| E130012A19    | NM_175332.3    | 2.136957441 | 0.000639578 |
| LOC674960     | XR_004709.2    | 2.132483908 | 9.30E-05    |
| Slc12a8       | NM_001083902.1 | 2.1267519   | 0.003594056 |
| Klhl5         |                | 2.123044699 | 0.000208482 |
| D130067N01Rik |                | 2.117154502 | 0.000650056 |
| Nln           | NM_029447.2    | 2.116564724 | 0.000524798 |
| Ldhd          | NM_027570.3    | 2.108700229 | 0.012432456 |
| 1810007P19I   | NM_172701.2    | 2.105433403 | 0.000439039 |
| Fgfr1         | NM_010206.2    | 2.088391068 | 0.011758274 |
| 9430038I01R   | XM_917763.2    | 2.076818188 | 3.10E-05    |
| Gm347         | NM_001005420.1 | 2.062334539 | 0.000238691 |

|               |                |             |             |
|---------------|----------------|-------------|-------------|
| Slc22a21      | NM_019723.2    | 2.056403511 | 0.0121836   |
| Syde1         | XM_359260.3    | 2.043483433 | 0.001609289 |
| Dyrk3         | NM_145508.2    | 2.020562536 | 0.000198301 |
| Ldhd          | NM_027570.3    | 2.013775721 | 0.018559588 |
| Rsph1         | NM_025290.3    | 2.010742564 | 0.005807852 |
| Klhl5         |                | 1.988936966 | 0.000165706 |
| Dnalc1        | NM_028821.2    | 1.988730784 | 0.004822477 |
| Spats1        | NM_027649.2    | 1.97995278  | 0.001151247 |
| E430003D02Rik |                | 1.967460842 | 0.001226778 |
| Garnl3        | NM_178888.4    | 1.955920037 | 0.000268465 |
| Wdr31         | NM_023597.1    | 1.944345899 | 0.01013547  |
| Pmm1          |                | 1.943658177 | 0.002188367 |
| A830048E23Rik |                | 1.93935147  | 0.015080712 |
| Zfhx3         | NM_007496.2    | 1.933174126 | 0.045283369 |
| Arvcf         |                | 1.925687699 | 0.007750254 |
| Mcam          | NM_023061.1    | 1.918362687 | 0.002705271 |
| 1110036O03    | NM_176830.2    | 1.901867504 | 0.0157994   |
| Zfp599        | NM_181419.2    | 1.875587591 | 0.00434829  |
| Shq1          | NM_181590.3    | 1.87230707  | 0.000159888 |
| Nt5dc2        | NM_027289.1    | 1.855082529 | 2.67E-06    |
| Pvrl2         | NM_008990.2    | 1.854434159 | 0.009870619 |
| E330016A19    | NM_173386.3    | 1.849911661 | 3.12E-05    |
| Bag2          | NM_145392.2    | 1.849394852 | 0.000676459 |
| Prpf40b       | NM_018786.1    | 1.847713109 | 9.07E-05    |
| Arsi          | NM_001038499.1 | 1.841782518 | 0.0244838   |
| 9430038I01R   | XM_925223.2    | 1.838653776 | 1.37E-05    |
| D030034I04Rik |                | 1.836812761 | 1.33E-05    |
| Armc9         | NM_027456.1    | 1.836471206 | 0.002476749 |
| Prpf40b       | NM_018786.2    | 1.821367327 | 7.72E-05    |
| Thg1l         | NM_001080969.1 | 1.790908767 | 0.000397305 |
| Pcbp4         | NM_021567.2    | 1.781167326 | 0.000355625 |
| Spag4         | NM_139151.4    | 1.752102653 | 0.00232422  |
| Mcam          | NM_023061.1    | 1.744227085 | 0.000454923 |
| Lpcat4        | NM_207206.1    | 1.72415551  | 0.002452552 |
| Cox6b2        | NM_183405.1    | 1.718817326 | 0.003359413 |
| Rwdd2         |                | 1.717692448 | 9.57E-05    |
| Rcl1          | NM_021525.2    | 1.70283173  | 0.000512117 |
| Nlgn2         | NM_198862.2    | 1.685722235 | 0.000398157 |
| Zfp41         | NM_011759.1    | 1.64096609  | 1.71E-05    |
| Nln           | NM_029447.1    | 1.633764522 | 9.62E-05    |
| Igf2bp2       | NM_183029.1    | 1.629075934 | 0.005546777 |
| Stab1         | NM_138672.2    | 1.619899995 | 3.18E-06    |
| 2700050C19Rik |                | 1.616080041 | 0.018693572 |
| Purg          | NM_001098233.1 | 1.61334545  | 0.014277099 |
| Rilpl1        | NM_021430.2    | 1.609586206 | 0.000247644 |
| 1700010H15Rik |                | 1.606109189 | 0.005594331 |

|               |                |             |             |
|---------------|----------------|-------------|-------------|
| Dclk2         | NM_027539.3    | 1.602772698 | 0.049210011 |
| Kctd17        | NM_001081367.1 | 1.599954295 | 0.00065556  |
| Fbxw8         | NM_172721.2    | 1.599930284 | 9.69E-05    |
| Nln           | NM_029447.1    | 1.593474326 | 0.000184561 |
| 5330431N19    | NM_172639.1    | 1.583225311 | 1.30E-05    |
| Ccdc109a      | NM_001033259.2 | 1.582794325 | 0.008486695 |
| D130074M14Rik |                | 1.575716363 | 0.000351517 |
| BC066107      | NM_207245.1    | 1.569333418 | 0.005919195 |
| Pkig          | NM_001039391.1 | 1.561817479 | 0.000475517 |
| Xrcc6         | NM_010247.2    | 1.558804449 | 0.00250503  |
| Pbx3          | NM_016768.1    | 1.552821481 | 0.006443228 |
| Itpka         | NM_146125.1    | 1.550150727 | 0.004609261 |
| Isyna1        | NM_023627.1    | 1.549821962 | 0.000996137 |
| Dis3          | NM_028315.2    | 1.547959642 | 0.000279773 |
| Fbxo44        | NM_173401.2    | 1.540969786 | 6.46E-05    |
| 4833427B12Rik |                | 1.532322346 | 0.000274425 |
| Pmm1          | NM_013872.2    | 1.531330604 | 0.000229923 |
| Espl1         | NM_001014976.1 | 1.521870218 | 3.51E-05    |
| 2610301B20    | NM_026005.2    | 1.520836109 | 3.18E-05    |
| Grwd1         | NM_153419.1    | 1.484102383 | 0.000263815 |
| Impa2         |                | 1.469402591 | 4.51E-05    |
| Gins2         | NM_178856.1    | 1.465245662 | 6.88E-05    |
| Zfp365        | XM_980076.1    | 1.461924199 | 0.03401545  |
| Tpi1          | NM_009415.1    | 1.459581583 | 6.70E-05    |
| 5330431N19    | NM_172639.1    | 1.455136655 | 0.000199131 |
| Tmem201       | NM_001025106.1 | 1.452909031 | 0.001276681 |
| 3830430K15Rik |                | 1.446205755 | 5.34E-05    |
| LOC1000483    | XM_001480281.1 | 1.434673287 | 0.000909188 |
| Tex9          | NM_009359.2    | 1.425094305 | 0.000668896 |
| Apex1         | NM_009687.1    | 1.415178458 | 0.003955312 |
| Pmm1          | NM_013872.1    | 1.41300665  | 4.82E-05    |
| Slc7a7        | NM_011405.3    | 1.412204342 | 0.004150882 |
| Morn2         | NM_194269.1    | 1.404458839 | 9.05E-05    |
| Wwc2          | NM_133791.4    | 1.40441557  | 0.000916446 |
| D15Ertd682e   | NM_028003.1    | 1.404171361 | 9.63E-06    |
| Slc29a1       | NM_022880.1    | 1.396000221 | 0.000664102 |
| Prr13         | NM_025385.2    | 1.382210323 | 0.001476747 |
| AU022508      |                | 1.378787657 | 0.000849123 |
| LOC677144     | XM_001004138.1 | 1.378763701 | 5.34E-05    |
| Dcun1d4       | NM_178896.4    | 1.37558953  | 0.000709678 |
| Elf2          | NM_023502.1    | 1.374903777 | 0.005853236 |
| LOC1000483    | XR_034455.1    | 1.371083771 | 0.002142924 |
| 3110013H01    | XM_203393.1    | 1.370732536 | 0.020724235 |
| Yaf2          | NM_024189.5    | 1.361760866 | 0.000175354 |
| Myc           | NM_010849.4    | 1.361751485 | 0.016803067 |
| Llph          | NM_025431.2    | 1.34342549  | 0.001108178 |

|               |                |             |             |
|---------------|----------------|-------------|-------------|
| Wdr31         | NM_023597.1    | 1.338131346 | 0.013441711 |
| 4833426H15Rik |                | 1.330589204 | 0.033442054 |
| Tpi1          | NM_009415.1    | 1.328240597 | 7.94E-05    |
| 1500009L16f   | XM_899407.2    | 1.324485733 | 0.030877604 |
| Ctnnbip1      | NM_023465.3    | 1.317058448 | 0.014767001 |
| Renbp         | NM_023132.2    | 1.316864188 | 0.000488088 |
| Xrcc6         | NM_010247.2    | 1.31605386  | 0.032686667 |
| BC022687      | NM_145450.3    | 1.310744998 | 0.033928052 |
| Med22         | NM_001033908.1 | 1.298405115 | 0.000192943 |
| Faf1          | NM_007983.2    | 1.279518365 | 2.94E-05    |
| Usp2          | NM_198091.2    | 1.26963347  | 0.003683843 |
| Stk3          | NM_019635.2    | 1.269292591 | 0.012247074 |
| lpo5          | NM_023579.4    | 1.258136771 | 0.000774228 |
| R74862        | NM_133790.1    | 1.258019524 | 0.035015617 |
| 3010003L21f   | XR_005252.1    | 1.254988335 | 0.025791325 |
| Dut           | NM_023595.5    | 1.252346486 | 0.000510219 |
| 2010317E24f   | XM_130053.2    | 1.247580674 | 0.000943192 |
| Unc119        | NM_011676.2    | 1.246826387 | 0.032529429 |
| Zfp446        | NM_175558.2    | 1.23707994  | 0.000260089 |
| scl000408.1   | AK009508.1     | 1.228599949 | 0.000846402 |
| Stk3          |                | 1.222551834 | 0.005499363 |
| Stard6        | NM_029019.3    | 1.213146257 | 0.001385926 |
| Nup37         | NM_028334.3    | 1.212825019 | 0.004583377 |
| Tspan6        | NM_019656.3    | 1.209496793 | 0.040030082 |
| BC039210      | XM_001481316.1 | 1.208644409 | 0.000114783 |
| 4930570C03f   | NM_026353.2    | 1.207995744 | 0.000139549 |
| Zfp446        | NM_175558.3    | 1.20436533  | 0.000335742 |
| Slc7a7        | NM_011405.1    | 1.200592906 | 0.00715605  |
| Cask          | NM_009806.2    | 1.194973686 | 0.043183428 |
| LOC384338     | XM_357585.1    | 1.194484847 | 0.00153554  |
| LOC1000476    | XM_001478602.1 | 1.189443822 | 0.000828019 |
| Gale          | NM_178389.3    | 1.176783092 | 0.003150163 |
| Zkscan17      | NM_172941.2    | 1.163170105 | 0.000135789 |
| Gale          | NM_178389.3    | 1.161748227 | 0.00706131  |
| Gins2         | NM_178856.1    | 1.139643216 | 0.000178525 |
| Phf13         | NM_172705.1    | 1.137612529 | 0.00233663  |
| Tmem107       | NM_025838.1    | 1.135852532 | 0.001294375 |
| Trip10        | NM_134125.3    | 1.122147791 | 0.00335773  |
| Shmt1         |                | 1.115740034 | 0.049448477 |
| Polr2f        | NM_027231.1    | 1.111316007 | 8.96E-05    |
| Grwd1         | NM_153419.1    | 1.104800228 | 0.00645402  |
| Prdx4         | NM_016764.3    | 1.090759625 | 7.74E-05    |
| Larp2         | NM_001040399.1 | 1.087268296 | 0.047695765 |
| 1110031102R   | NM_025402.1    | 1.084653989 | 6.94E-05    |
| A130027D22Rik |                | 1.079216666 | 0.038703279 |
| Cercam        | NM_207298.2    | 1.070269131 | 0.015660678 |

|               |                |              |             |
|---------------|----------------|--------------|-------------|
| Tmem201       | NM_001025106.1 | 1.056129969  | 0.007272285 |
| A830080H07Rik |                | 1.054811817  | 0.001098973 |
| Acpl2         | NM_153420.2    | 1.045773123  | 0.001172405 |
| Wdr77         | NM_027432.3    | 1.036586132  | 0.000361599 |
| 1810055G02    | NM_028077.2    | 1.020850234  | 0.005492999 |
| scl0004175.1  | BC026739.1     | 1.004724937  | 0.00342796  |
| Plcb3         | NM_008874.2    | 0.99773697   | 0.01263227  |
| Tens1         |                | 0.984025592  | 0.012817824 |
| Pus1          | NM_001025561.2 | 0.981654366  | 0.033466387 |
| EG667190      | XR_002058.1    | 0.973065228  | 0.000875419 |
| Rcl1          | NM_021525.2    | 0.971016335  | 0.01543775  |
| Tens1         |                | 0.969135879  | 0.014000496 |
| Nutf2         | NM_026532.3    | 0.968814462  | 0.003330524 |
| Ahsa2         | NM_172391.3    | 0.966724754  | 0.002142924 |
| Elovl1        | NM_001039175.1 | 0.94518611   | 0.001485345 |
| 5330431N19    | NM_172639.2    | 0.934093619  | 0.000911211 |
| Arrb1         | NM_178220.3    | 0.931656168  | 0.046363015 |
| Asb1          | NM_023046.4    | 0.929433721  | 0.007356093 |
| 2410015N17    | NM_023203.1    | 0.927121563  | 0.004899855 |
| Dph3          | NM_001047433.1 | 0.913814003  | 0.005422149 |
| Pabpc4        | NM_148917.2    | 0.911388822  | 0.022522421 |
| Rcl1          | NM_021525.2    | 0.905947026  | 0.014735553 |
| BC022224      | NM_177564.4    | 0.905060387  | 0.022719683 |
| Azi1          | NM_009734.1    | 0.900801726  | 0.00697379  |
| LOC383897     | XM_357315.1    | 0.895363975  | 0.040030082 |
| Gpsm1         | NM_153410.2    | 0.891828448  | 0.001921997 |
| Hexdc         | NM_001001333.1 | 0.883360088  | 0.001189752 |
| Mycbp         | NM_019660.3    | 0.84784789   | 0.008795821 |
| Palm          | NM_023128.2    | 0.844174007  | 0.004569138 |
| Limk1         | NM_010717.2    | 0.832017102  | 0.009702118 |
| Edg5          |                | 0.795125996  | 0.043358676 |
| Sntb2         |                | 0.794964652  | 0.007473387 |
| Ssx2ip        | NM_138744.2    | 0.791576683  | 0.009718781 |
| Adk           | NM_134079.3    | 0.790942802  | 0.008070294 |
| Kif3a         | NM_008443.3    | 0.778974601  | 0.021041703 |
| Mycbp         | NM_019660.2    | 0.764821416  | 0.008811184 |
| Gpsm1         | NM_153410.4    | 0.720499866  | 0.00842765  |
| Phlpp         | XM_900133.2    | 0.716723055  | 0.024576864 |
| D15Mit260     |                | 0.714906251  | 0.003243574 |
| Nudt22        | NM_026675.2    | 0.675306805  | 0.047256714 |
| ENSMUSG00     | NM_145433.1    | 0.648205709  | 0.017980137 |
| 1810027O10    | XM_109683.4    | 0.616920537  | 0.013402026 |
| Pes1          | NM_022889.3    | 0.591457499  | 0.029061048 |
| Rnf170        | NM_029965.2    | -0.614763648 | 0.035433303 |
| Pik3cg        |                | -0.775255843 | 0.032921845 |
| Psd4          | NM_177611.3    | -0.806842619 | 0.001553505 |

|               |                |              |             |
|---------------|----------------|--------------|-------------|
| Lime1         | NM_023684.2    | -0.892603415 | 0.032521409 |
| Traf2         | NM_009422.2    | -0.89372469  | 0.03359778  |
| Plxnd1        | NM_026376.3    | -0.895475023 | 0.006410485 |
| Sla2          | NM_029983.4    | -0.901195488 | 0.028932613 |
| 6230425C21Rik |                | -0.963435917 | 0.00667561  |
| Epc1          | NM_007935.1    | -0.99906246  | 0.000573522 |
| Sit1          | NM_019436.1    | -1.014132418 | 0.021397792 |
| Scarb2        | NM_007644.2    | -1.022889427 | 0.001924468 |
| Mgea5         |                | -1.025379416 | 0.007126769 |
| Birc2         | NM_007465.1    | -1.060411821 | 2.39E-05    |
| Hmha1         | NM_027521.2    | -1.061963798 | 0.002551125 |
| AA960436      | NM_133954.1    | -1.078321213 | 0.020261384 |
| Rnf167        | NM_027445.1    | -1.10536411  | 0.00079799  |
| Clk3          | NM_007713.3    | -1.10570276  | 0.001030088 |
| Map4k2        | NM_009006.2    | -1.113315841 | 0.00161144  |
| 9530018107Rik |                | -1.122250591 | 0.018235705 |
| Epc1          | NM_007935.1    | -1.127655398 | 0.000586672 |
| Rasl11b       | NM_026878.1    | -1.136024161 | 0.038991515 |
| 5430411K18    | XM_916282.3    | -1.136026376 | 0.00018389  |
| Rasl11b       | NM_026878.1    | -1.139589715 | 0.038209582 |
| Prrt1         | NM_030890.1    | -1.14964284  | 0.041942767 |
| Trim56        | NM_201373.3    | -1.154817813 | 0.003524534 |
| Parp6         | NM_029922.2    | -1.170409881 | 0.003517831 |
| Snx15         | NM_026912.1    | -1.191356542 | 0.000379479 |
| Rnf167        | NM_027445.1    | -1.19276231  | 0.00031193  |
| Snapc3        | NM_029949.1    | -1.20325568  | 0.000710524 |
| 6330442E10    | NM_178745.3    | -1.20535179  | 0.02232689  |
| Itk           | NM_010583.2    | -1.209197393 | 0.004741862 |
| LOC1000483    | XM_001479795.1 | -1.214979127 | 0.002752797 |
| Znrf1         | NM_133206.2    | -1.220667819 | 0.000146699 |
| BC006779      |                | -1.221440618 | 0.001056814 |
| Il2rg         |                | -1.23414166  | 0.00098419  |
| Apoa4         | NM_007468.2    | -1.238869587 | 0.032629774 |
| Tmem77        | NM_026013.2    | -1.240744658 | 0.000911211 |
| Klf7          |                | -1.245431748 | 0.001751613 |
| Nfatc3        |                | -1.249101449 | 0.010224774 |
| Rcan3         | NM_022980.4    | -1.263661892 | 0.001548296 |
| Nfkbid        | NM_172142.3    | -1.263966483 | 0.003871882 |
| Dscr1l2       | NM_022980.3    | -1.270305451 | 0.001836703 |
| Rnf167        | NM_027445.1    | -1.285018459 | 0.00096234  |
| 5830432E09    | XM_150021.1    | -1.29585684  | 0.035015617 |
| LOC380617     | XM_149644.3    | -1.297724254 | 0.005358954 |
| AI987692      | NM_177912.2    | -1.308393848 | 0.033555985 |
| Ppfibp2       | NM_008905.1    | -1.335976395 | 0.030319625 |
| Pdlim2        | NM_145978.1    | -1.339664659 | 0.035280502 |
| Mllt11        | NM_019914.3    | -1.348140697 | 0.000142676 |



|             |                |              |             |
|-------------|----------------|--------------|-------------|
| 0610010K14  | NM_026757.1    | -1.351417359 | 0.003987764 |
| Vim         | NM_011701.3    | -1.381902494 | 0.001080488 |
| A430106G13  | Rik            | -1.382622494 | 0.044287367 |
| Ogt         | NM_139144.2    | -1.389461051 | 0.000345944 |
| Msn         |                | -1.394748233 | 6.54E-05    |
| 2410019G02  | XM_126427.5    | -1.39703531  | 0.001479165 |
| Chchd2      | NM_024166.4    | -1.411311858 | 0.000260089 |
| Ogt         | NM_139144.2    | -1.412198795 | 0.000188421 |
| Ppp1r3b     | NM_177741.3    | -1.415432647 | 0.003740258 |
| Lcp2        |                | -1.436919256 | 0.005492429 |
| A130010J15F | NM_181048.2    | -1.443491979 | 0.000753524 |
| A930024E05  | XR_005345.1    | -1.457036255 | 0.013065294 |
| Arhgap4     | NM_138630.1    | -1.457068794 | 0.000157739 |
| Inpp5d      | NM_010566.1    | -1.467515894 | 0.005745807 |
| Nedd9       | NM_017464.2    | -1.472157182 | 0.002113372 |
| Sdcbp2      | NM_145535.1    | -1.475832563 | 0.0052739   |
| Arhgef6     | NM_152801.1    | -1.477004142 | 0.013726151 |
| Rgs14       | NM_016758.2    | -1.478688954 | 0.000821696 |
| Il28ra      | NM_174851.2    | -1.489332651 | 0.011448565 |
| Nedd9       | NM_017464.2    | -1.496788222 | 0.004856707 |
| Znf512b     | XM_977462.2    | -1.504268021 | 0.015484765 |
| D330026F23  | Rik            | -1.516679296 | 0.019780307 |
| Tmub1       | NM_022418.1    | -1.5320419   | 0.000340387 |
| Spo11       | NM_012046.2    | -1.539944998 | 0.029146405 |
| 1110034G24  | XM_001000361.1 | -1.54012031  | 0.013119095 |
| Tmc8        | NM_181856.1    | -1.563776387 | 0.030979174 |
| Ppfibp2     | NM_008905.1    | -1.563856019 | 0.015445659 |
| Itk         |                | -1.586174519 | 0.008247325 |
| 9030607L17f | NM_027829.1    | -1.587539984 | 0.006154936 |
| 2010007L08  | Rik            | -1.588215834 | 0.031819323 |
| Foxp3       | NM_054039.1    | -1.591744097 | 0.006050222 |
| Abi3        |                | -1.600222745 | 0.049040934 |
| LOC1000473  | XM_001477963.1 | -1.60109297  | 0.000728273 |
| LOC545238   | NM_001034897.1 | -1.626727386 | 0.018008996 |
| Aim1        | NM_172393.1    | -1.627395367 | 0.019794029 |
| Dock10      | XM_129913.4    | -1.630793564 | 0.046170573 |
| Il23a       | NM_031252.2    | -1.636443327 | 0.023704956 |
| Btg1        | NM_007569.1    | -1.639232349 | 0.000128302 |
| Cd84        | NM_013489.1    | -1.640690325 | 2.02E-05    |
| Atg10       | NM_025770.3    | -1.643765197 | 0.000208536 |
| Ap3m2       | NM_029505.1    | -1.660985046 | 0.004661298 |
| Vamp1       | NM_009496.2    | -1.687877827 | 0.002341554 |
| 1190002H23  | NM_025427.2    | -1.694331761 | 0.030295453 |
| Ypel3       | NM_025347.1    | -1.695634977 | 0.000568145 |
| Cdk5r1      | NM_009871.2    | -1.698015525 | 0.000233626 |
| Vamp1       | NM_001080557.1 | -1.723465836 | 0.001670058 |

|               |                |              |             |
|---------------|----------------|--------------|-------------|
| Btla          | NM_177584.3    | -1.731381783 | 0.03448067  |
| Foxp3         | NM_054039.1    | -1.739202723 | 0.001471854 |
| Gm889         | NM_001033437.1 | -1.745629796 | 0.024600014 |
| Txnip         | NM_023719.1    | -1.749802073 | 0.018103917 |
| Ube1l         | NM_023738.4    | -1.770215382 | 0.000339472 |
| EG433229      | XM_899874.3    | -1.772419607 | 0.010743512 |
| Txnip         | NM_001009935.2 | -1.789425275 | 0.021041703 |
| Dennd1c       | NM_153551.1    | -1.801642165 | 0.000545104 |
| LOC226017     | XM_129164.2    | -1.803024036 | 0.011076116 |
| A430031F07Rik |                | -1.817605492 | 0.018771435 |
| Obfc2a        | NM_028696.2    | -1.818436547 | 9.57E-05    |
| Gtdc1         | NM_172662.1    | -1.819958816 | 0.00036389  |
| Ankrd6        | NM_080471.3    | -1.832945745 | 0.046672081 |
| Slc37a1       |                | -1.86204961  | 0.00021855  |
| Ankrd6        | NM_080471.2    | -1.871887679 | 0.030030667 |
| 6030452M24Rik |                | -1.872001464 | 0.002169129 |
| Slc25a45      | NM_134154.3    | -1.87695144  | 0.000350824 |
| Ift172        | NM_026298.4    | -1.891066841 | 0.004661298 |
| D14Ertd668e   | NM_199015.1    | -1.897468978 | 0.001123159 |
| Tec           | NM_013689.4    | -1.930664811 | 0.014027522 |
| LOC332579     | XM_285326.2    | -1.930812689 | 0.01498736  |
| LOC380844     | XM_358441.1    | -1.93567644  | 0.002540302 |
| Defb19        | NM_145157.2    | -1.943700827 | 0.000877489 |
| LOC383153     | XM_356899.1    | -1.958951883 | 0.007083297 |
| Ccrk          | NM_053180.2    | -1.971124219 | 0.0024147   |
| A130038J17Rik |                | -1.972719387 | 0.032041182 |
| Bcl2a1d       |                | -2.001183287 | 0.016817349 |
| Trat1         | NM_198297.3    | -2.012206153 | 0.030854628 |
| Ctnna1        | NM_009818.1    | -2.023144962 | 0.002444929 |
| Mier1         | NM_027696.2    | -2.032290481 | 0.000944435 |
| Ebi3          | NM_015766.2    | -2.049399767 | 0.002106202 |
| Fbxw17        | NM_175401.3    | -2.051995855 | 0.004822477 |
| Nptx2         | NM_016789.2    | -2.061879093 | 0.00727257  |
| B3gnt8        | NM_146184.4    | -2.075380529 | 0.000650056 |
| Bcl2a1b       | NM_007534.1    | -2.079431627 | 0.006112507 |
| Krt84         | NM_008474.1    | -2.097742435 | 0.000263798 |
| LOC623121     | XM_001480713.1 | -2.109298806 | 9.30E-05    |
| Inpp4b        | NM_001024617.2 | -2.122152124 | 0.004580873 |
| 5830411E10Rik |                | -2.127023041 | 0.008495832 |
| Dhx58         | NM_030150.2    | -2.134954389 | 0.000355625 |
| Dhx58         | NM_030150.2    | -2.136518079 | 0.003475627 |
| LOC380706     | XM_354621.1    | -2.159096213 | 0.004601405 |
| Bcl6          | NM_009744.3    | -2.164770193 | 0.004926829 |
| Creld1        | NM_133930.1    | -2.172131478 | 6.46E-05    |
| Stx1a         | NM_016801.3    | -2.208712745 | 0.001944807 |
| Rsd1-pending  |                | -2.210392239 | 0.001088414 |

|               |                |              |             |
|---------------|----------------|--------------|-------------|
| Relb          | NM_009046.2    | -2.232372004 | 0.004930247 |
| A130021K16Rik |                | -2.241188965 | 0.00021855  |
| Fbxw10        | NM_001033669.1 | -2.245686324 | 0.000286994 |
| Muc1          | NM_013605.1    | -2.247515476 | 0.00645402  |
| Ncf1          | NM_010876.2    | -2.262417411 | 0.005852525 |
| Klk1b9        | NM_010116.1    | -2.272405538 | 0.000134676 |
| LOC667370     | XM_001480084.1 | -2.278490994 | 0.001476919 |
| Camkk1        | NM_018883.2    | -2.288971133 | 0.013988482 |
| 5031439A09Rik |                | -2.307960503 | 0.00024441  |
| Tnfrsf11a     | NM_009399.3    | -2.318029549 | 0.001936978 |
| Ankrd6        | NM_080471.3    | -2.338491405 | 0.001792436 |
| Tmem118       | NM_172998.2    | -2.353042183 | 0.024425318 |
| Dgka          | NM_016811.2    | -2.358067154 | 0.00402218  |
| Dgka          | NM_016811.2    | -2.362821594 | 0.004571092 |
| Dhrs3         | NM_011303.4    | -2.370197107 | 2.73E-06    |
| Edaradd       | NM_133643.3    | -2.377806077 | 0.032521409 |
| Gpr146        | NM_001038703.1 | -2.389340585 | 0.005672507 |
| F830005D05Rik |                | -2.392129076 | 0.024131954 |
| Tnfrsf4       | NM_011659.2    | -2.397437763 | 1.55E-06    |
| Klk1b1        | NM_010645.2    | -2.409229531 | 0.00077184  |
| Phxr4         | NM_008835.1    | -2.426234986 | 0.000709657 |
| Samhd1        | NM_018851.2    | -2.426565876 | 0.00109112  |
| Ankrd6        | NM_001012451.1 | -2.431216286 | 0.020843092 |
| Zfp36         | NM_011756.4    | -2.438705481 | 4.05E-05    |
| Phxr2         | NM_008833.1    | -2.456386365 | 0.010038055 |
| Tox3          | NM_172913.2    | -2.459737681 | 5.62E-06    |
| Imap38        |                | -2.488156727 | 0.02872835  |
| AA536717      |                | -2.489861089 | 0.002079122 |
| Fscn1         | NM_007984.2    | -2.490907315 | 9.51E-05    |
| Cdc42ep3      | NM_026514.2    | -2.493277504 | 0.000157579 |
| Samd9l        | XM_620286.3    | -2.533188659 | 0.001760796 |
| Centd1        | XM_001001363.1 | -2.534260552 | 0.000192943 |
| Hcst          | NM_011827.2    | -2.544725767 | 0.002446316 |
| Gpr174        | NM_001033251.2 | -2.54475138  | 0.001931412 |
| Gbp2          | NM_010260.1    | -2.558750734 | 0.003379243 |
| Ankrd50       | NM_001033198.2 | -2.573296682 | 0.000115689 |
| Cd4           | NM_013488.2    | -2.593869206 | 0.025284191 |
| Edaradd       | NM_133643.3    | -2.605834472 | 0.045897376 |
| 2010016118Rik |                | -2.642902333 | 0.038807748 |
| Oas1g         | NM_011852.2    | -2.648733638 | 0.011253067 |
| Cdx1          | NM_009880.2    | -2.652678635 | 0.000178525 |
| 4930402H24Rik |                | -2.665381606 | 0.010581309 |
| D330050H21Rik |                | -2.665898707 | 1.80E-05    |
| Stat4         | NM_011487.3    | -2.688647506 | 0.008460011 |
| Hsd11b1       | NM_008288.1    | -2.707851547 | 0.007448913 |
| Hsd11b1       | NM_008288.1    | -2.708690022 | 0.006353535 |

|                 |                |              |             |
|-----------------|----------------|--------------|-------------|
| Podxl2          | NM_176973.3    | -2.712706996 | 0.004117711 |
| Tactile-pending |                | -2.71394893  | 0.019403731 |
| Tnfrsf11b       | NM_008764.3    | -2.723934454 | 0.006288021 |
| Hsd11b1         | NM_008288.2    | -2.724132606 | 0.005138396 |
| Gimap1          | NM_008376.3    | -2.738213702 | 0.031929166 |
| Lypd6b          | NM_027990.3    | -2.748245071 | 0.006739663 |
| Sct             | NM_011328.2    | -2.807097129 | 0.001842415 |
| lpas            |                | -2.839246726 | 0.023488514 |
| 5830431A10      | XR_002313.1    | -2.840528297 | 0.00644676  |
| Xkrx            | NM_183319.2    | -2.856393544 | 1.23E-06    |
| Tm4sf5          | NM_029360.1    | -2.856611679 | 0.002266765 |
| EG546036        | XM_898878.2    | -2.872985953 | 1.94E-05    |
| Fabp9           | NM_011598.2    | -2.906606839 | 8.50E-05    |
| Zc3h12d         | NM_172785.2    | -2.906896763 | 0.030295453 |
| Ifit3           | NM_010501.1    | -2.912706719 | 0.000128521 |
| Bin1            | NM_009668.1    | -2.914752838 | 0.000157579 |
| 6330500D04      | NM_178658.4    | -2.956549871 | 0.000274425 |
| A230077110Rik   |                | -2.963557664 | 0.009885517 |
| Aqp9            | NM_022026.2    | -2.977103806 | 3.69E-06    |
| Dnmt3l          | NM_001081695.1 | -2.980843951 | 0.000350824 |
| Prodh           | NM_011172.1    | -3.046801469 | 0.000649701 |
| LOC1000388      | XM_001471686.1 | -3.052031015 | 6.47E-05    |
| Ccr8            | NM_007720.2    | -3.053455856 | 0.000208482 |
| Prodh           | NM_011172.2    | -3.056605582 | 0.002101429 |
| Hsd11b1         | NM_008288.2    | -3.075794687 | 0.016853078 |
| Irf6            | NM_016851.2    | -3.097065288 | 0.012759773 |
| Akr1c18         | NM_134066.2    | -3.109133756 | 1.32E-07    |
| Cd52            | NM_013706.1    | -3.12160504  | 0.003146273 |
| C85492          | NM_153540.3    | -3.141633414 | 2.45E-05    |
| LOC625360       | NM_001037925.1 | -3.143857892 | 0.041713576 |
| Abp1            | NM_029638.1    | -3.153973634 | 0.012142971 |
| Cd52            |                | -3.15631566  | 0.004282454 |
| Parp8           | NM_001081009.1 | -3.161528607 | 0.000243816 |
| Idi2            | NM_177197.4    | -3.166289494 | 4.26E-06    |
| Gpr18           | NM_182806.1    | -3.200862878 | 0.00898517  |
| Wdr78           | NM_146254.2    | -3.208334677 | 4.46E-05    |
| Klk7            | NM_011872.2    | -3.22694627  | 3.10E-05    |
| LOC546629       | XM_903552.2    | -3.241122385 | 0.025355016 |
| A430002G09Rik   |                | -3.247305081 | 0.000614857 |
| Gpr174          | NM_001033251.1 | -3.253837231 | 0.001339636 |
| Cd70            | NM_011617.1    | -3.292562299 | 7.06E-06    |
| Cxcl10          | NM_021274.1    | -3.311070638 | 0.004661298 |
| Oas2            | NM_145227.1    | -3.321029248 | 0.000948731 |
| Sytl2           | NM_001040088.1 | -3.323189864 | 0.012266701 |
| LOC436539       | XM_988327.1    | -3.326063018 | 0.019496575 |
| AI451557        | NM_001033207.2 | -3.332250128 | 0.015064601 |

|                               |                |              |             |
|-------------------------------|----------------|--------------|-------------|
| LOC1000466                    | XM_001476658.1 | -3.359478132 | 7.28E-05    |
| 4832420L08Rik                 |                | -3.424921643 | 6.45E-05    |
| Krt16                         | NM_008470.1    | -3.492332786 | 6.96E-06    |
| Icos                          | NM_017480.1    | -3.53670772  | 3.42E-05    |
| LOC1000488                    | XM_001479117.1 | -3.537603696 | 0.000478305 |
| Scgb1c1                       | NM_001099742.1 | -3.556360451 | 7.14E-05    |
| 9530019H20                    | NM_177308.2    | -3.557519209 | 2.97E-07    |
| Fgf21                         | NM_020013.4    | -3.565212186 | 9.57E-05    |
| Ccnd2                         |                | -3.638430372 | 7.71E-06    |
| C85492                        | NM_153540.3    | -3.664198321 | 0.000160495 |
| Tctex1d1                      | NM_026100.2    | -3.744178342 | 0.011836577 |
| F13a1                         | NM_028784.2    | -3.782288234 | 0.018652521 |
| Stat4                         | NM_011487.3    | -3.810882722 | 0.017750575 |
| Il4i1                         | NM_010215.2    | -3.811988962 | 0.001865193 |
| LOC333685                     | XM_289972.1    | -3.81236586  | 0.000585939 |
| P2rx1                         | NM_008771.2    | -3.840098266 | 0.001567109 |
| Mgst3                         | NM_025569.1    | -3.887438395 | 0.000231388 |
| Inpp4b                        | XM_134427.3    | -3.891671827 | 1.30E-05    |
| Dusp4                         |                | -3.897666546 | 0.035298643 |
| Aire                          | NM_009646.1    | -3.905771047 | 5.62E-06    |
| A430103M24Rik                 |                | -3.931657078 | 7.89E-05    |
| Pyy                           | NM_145435.1    | -3.967140163 | 2.91E-06    |
| Sfn1                          | NM_011407.1    | -3.981113866 | 0.000171774 |
| Gpr171                        | NM_173398.2    | -3.988218802 | 0.014608703 |
| Cd40                          | NM_170702.2    | -3.999504359 | 0.000972845 |
| Mgst3                         | NM_025569.1    | -4.04600439  | 0.000440865 |
| Klk8                          | NM_008940.2    | -4.058733126 | 3.90E-05    |
| BC094916                      | NM_001024721.1 | -4.103732906 | 0.000225248 |
| P2rx1                         | NM_008771.2    | -4.193069657 | 0.00481474  |
| Ccnd2                         | NM_009829.3    | -4.216435572 | 4.91E-05    |
| Centd1                        | XM_001001363.1 | -4.221001534 | 4.97E-05    |
| Ccnd2                         |                | -4.238295308 | 8.23E-05    |
| LOC630408                     | XM_903553.1    | -4.239648855 | 0.010701087 |
| Ccl5                          | NM_013653.2    | -4.552479919 | 0.00204505  |
| Fgf13                         | NM_010200.2    | -4.56306469  | 4.62E-10    |
| Fezf2                         | NM_080433.1    | -4.617594415 | 1.55E-06    |
| TRAV2_AF259071_T_cell_recepto |                | -4.623288033 | 0.000429106 |
| Smoc1                         | NM_022316.1    | -4.887400023 | 0.004314475 |
| Rag2                          | NM_009020.3    | -4.962174348 | 1.55E-06    |
| Tctex1d1                      | NM_026100.2    | -5.090313485 | 9.78E-07    |
| Aire                          | NM_009646.1    | -5.122806594 | 3.01E-05    |
| LOC1000411                    | XM_001476013.1 | -5.15446792  | 8.38E-05    |
| Csn2                          | NM_009972.1    | -5.475399251 | 1.06E-05    |
| Krtdap                        | NM_001033131.1 | -5.705423794 | 4.03E-09    |
| Cd69                          | NM_001033122.3 | -6.083953428 | 0.000864261 |
| LOC665446                     | XM_977005.1    | -7.99169934  | 1.20E-06    |

**Supplementary Table 2.** Commonly deregulated transcripts in *Hdac1+/Δ;Hdac2Δ/Δ*, *Hdac1Δ/Δ* and *Hdac1Δ/Δ;Hdac2Δ/+* lymphomas

**Gene ID**

1110008L16RIK  
1810007P19RIK  
1810055G02RIK  
2010107G12RIK  
2010317E24RIK  
2410019G02RIK  
2610301B20RIK  
3010003L21RIK  
3110013H01RIK  
3830430K15RIK  
4832420L08RIK  
4833427B12RIK  
4930570C03RIK  
5031439A09RIK  
5330431N19RIK  
5830411E10RIK  
9030607L17RIK  
9430038I01RIK  
9530019H20RIK  
A130010J15RIK  
A130021K16RIK  
A430002G09RIK  
A430103M24RIK  
A930024E05RIK  
AA536717  
ABP1  
ADK  
AI451557  
AIM1  
AIRE  
AKR1C18  
ANKRD6  
APEX1  
ARHGAP4  
ARHGEF6  
B3GNT8  
BAG2  
BC006779  
BC039210  
BC094916  
BCL2A1B  
BCL6  
BIN1  
BTG1  
C85492  
CCL5  
CCND2  
CCR8

CCRK  
CD40  
CD52  
CD69  
CD70  
CD84  
CDC42EP3  
CDX1  
CENTD1  
CERCAM  
CLK3  
COX6B2  
CRELD1  
CSN2  
CTNNA1  
CXCL10  
D030034I04RIK  
D130067N01RIK  
D15ERTD682E  
D330026F23RIK  
D330050H21RIK  
DDC  
DENND1C  
DHX58  
DIS3  
DUT  
DYRK3  
E130012A19RIK  
E330016A19RIK  
EBI3  
EG667190  
ELOVL1  
ENSMUSG00000054212  
EPB4.1L5  
EPC1  
EPHB2  
ESPL1  
F13A1  
FABP9  
FAF1  
FBXO44  
FEZF2  
FGF21  
FOXP3  
FSCN1  
GALE  
GINS2  
GM889  
GPR18  
GRWD1  
HEXDC  
HLCS  
HMHA1

HSD11B1  
ICOS  
IFIT3  
IGF2BP2  
IL4I1  
IMPA2  
INPP4B  
IPAS  
IPO5  
IRF6  
JAZF1  
JDP2  
KLF7  
KLK7  
KRT16  
KRTDAP  
LLPH  
LOC100041103  
LOC100046641  
LOC100048313  
LOC100048330  
LOC333685  
LOC380706  
LOC380844  
LOC383897  
LOC384338  
LOC436539  
LOC623121  
LOC630408  
LOC665446  
LOC667370  
LOC674611  
LOC677144  
LPAR2  
LPCAT4  
LYPD6B  
MAP4K2  
MCAM  
MCOLN2  
MED22  
MGST3  
MIER1  
MLLT11  
MORN2  
MUC1  
MYC  
NEDD9  
NFATC3  
NFKBID  
NLN  
NPHP4  
NT5DC2  
NUP37



NUTF2  
OAS1G  
OAS2  
OBFC2A  
OGT  
PABPC4  
PARP6  
PARP8  
PHXR4  
PMM1  
PPFIBP2  
PPP1R3B  
PRDX4  
PRICKLE1  
PRODH  
PRPF40B  
PRRT1  
PURG  
PUS1  
PVRL2  
PYY  
R74862  
RAG2  
RAMP3  
RCL1  
REEP1  
RELB  
RGS14  
RILPL1  
RNF167  
RSDR1-PENDING  
RWDD2  
SAMD9L  
SAMHD1  
SCARB2  
SCGB1C1  
SCL000408.1\_6  
SCL0004175.1\_57  
SCT  
SDC1  
SDCBP2  
SEMA6B  
SH3GL3  
SHMT1  
SHQ1  
SLC25A45  
SLC29A1  
SLC37A1  
SLFN1  
SMOC1  
SNTB2  
SNX15  
SPAG4

STAB1  
STARD6  
TCTEX1D1  
THG1L  
TMEM201  
TMUB1  
TNFRSF11A  
TNFRSF4  
TPI1  
TRAF2  
TRAV2\_AF259071\_T\_CELL\_RECEPTOR\_ALPHA\_VARIABLE\_2\_75  
TRIM56  
TTC26  
UBE1L  
UNC119  
VAMP1  
WDR31  
WDR67  
WDR77  
WNT5B  
XRCC6  
YAF2  
YPEL3  
ZC3H12D  
ZFP36  
ZFP365  
ZFP41  
ZFP446  
ZFP704  
ZKSCAN17  
ZNRF1

**Supplementary Table 3.** Common Targeted Genes (CTGs) deregulated in *Hdac1Δ/Δ;Hdac2Δ/+* thymocytes and lymphoma

| <b>Gene symbol</b> | <b>Rank</b> | <b>Count</b> | <b>Ensembl ID</b>  |
|--------------------|-------------|--------------|--------------------|
| MYC                | 2           | 340          | ENSMUSG00000022346 |
| JDP2               | 14          | 81           | ENSMUSG00000034271 |
| CCND2              | 27          | 35           | ENSMUSG00000000184 |
| CD52               | 46          | 21           | ENSMUSG00000000682 |
| 1190002H23RIK      | 49          | 21           | ENSMUSG00000022018 |
| MGAT4A             | 114         | 14           | ENSMUSG00000026110 |
| JAZF1              | 130         | 13           | ENSMUSG00000063568 |
| 2010107G12RIK      | 206         | 10           | ENSMUSG00000029847 |
| STK3               | 307         | 8            | ENSMUSG00000022329 |
| XRCC6              | 309         | 8            | ENSMUSG00000022471 |
| SLA2               | 326         | 8            | ENSMUSG00000027636 |
| CD69               | 336         | 8            | ENSMUSG00000030156 |
| LDHD               | 341         | 8            | ENSMUSG00000031958 |
| ARRB1              | 395         | 7            | ENSMUSG00000018909 |
| NEDD9              | 404         | 7            | ENSMUSG00000021365 |
| ETNK1              | 448         | 7            | ENSMUSG00000030275 |
| FGFR1              | 457         | 7            | ENSMUSG00000031565 |
| LCP2               | 508         | 6            | ENSMUSG0000002699  |
| ISYNA1             | 531         | 6            | ENSMUSG00000019139 |
| PDLIM2             | 548         | 6            | ENSMUSG00000022090 |
| RPAP3              | 553         | 6            | ENSMUSG00000022466 |
| GTDC1              | 628         | 6            | ENSMUSG00000036890 |
| TXNIP              | 631         | 6            | ENSMUSG00000038393 |
| ARMC9              | 648         | 6            | ENSMUSG00000062590 |
| KIF3A              | 706         | 5            | ENSMUSG00000018395 |
| CDK20              | 729         | 5            | ENSMUSG00000021483 |
| CD96               | 745         | 5            | ENSMUSG00000022657 |
| DCLK2              | 798         | 5            | ENSMUSG00000028078 |
| GALE               | 803         | 5            | ENSMUSG00000028671 |
| CASK               | 829         | 5            | ENSMUSG00000031012 |
| AP3M2              | 833         | 5            | ENSMUSG00000031539 |
| GIN52              | 836         | 5            | ENSMUSG00000031821 |
| USP2               | 839         | 5            | ENSMUSG00000032010 |
| FAM65B             | 859         | 5            | ENSMUSG00000036006 |
| PRODH              | 951         | 4            | ENSMUSG00000003526 |
| TNS3               | 1017        | 4            | ENSMUSG00000020422 |
| TMEM107            | 1028        | 4            | ENSMUSG00000020895 |
| 1110008L16RIK      | 1032        | 4            | ENSMUSG00000021023 |
| BIN1               | 1082        | 4            | ENSMUSG00000024381 |
| RBFOX3             | 1100        | 4            | ENSMUSG00000025576 |
| SAMHD1             | 1149        | 4            | ENSMUSG00000027639 |

|               |      |   |                    |
|---------------|------|---|--------------------|
| WDR31         | 1161 | 4 | ENSMUSG00000028391 |
| PLXND1        | 1187 | 4 | ENSMUSG00000030123 |
| AQP9          | 1216 | 4 | ENSMUSG00000032204 |
| BSN           | 1224 | 4 | ENSMUSG00000032589 |
| PKIG          | 1245 | 4 | ENSMUSG00000035268 |
| WNT8B         | 1251 | 4 | ENSMUSG00000036961 |
| INPP4B        | 1253 | 4 | ENSMUSG00000037940 |
| ACPL2         | 1278 | 4 | ENSMUSG00000043587 |
| 8430427H17RIK | 1308 | 4 | ENSMUSG00000061411 |
| ARVCF         | 1337 | 3 | ENSMUSG00000000325 |
| ZNF512B       | 1342 | 3 | ENSMUSG00000000823 |
| SPO11         | 1385 | 3 | ENSMUSG00000005883 |
| STX1A         | 1402 | 3 | ENSMUSG00000007207 |
| FAF1          | 1413 | 3 | ENSMUSG00000010517 |
| PABPC4        | 1414 | 3 | ENSMUSG00000011257 |
| DYRK3         | 1433 | 3 | ENSMUSG00000016526 |
| DHX58         | 1442 | 3 | ENSMUSG00000017830 |
| MRM1          | 1445 | 3 | ENSMUSG00000018405 |
| ITK           | 1465 | 3 | ENSMUSG00000020395 |
| ZKSCAN17      | 1467 | 3 | ENSMUSG00000020472 |
| ATG10         | 1495 | 3 | ENSMUSG00000021619 |
| WDR67         | 1508 | 3 | ENSMUSG00000022364 |
| SLC38A1       | 1528 | 3 | ENSMUSG00000023169 |
| KLF7          | 1589 | 3 | ENSMUSG00000025959 |
| ICOS          | 1590 | 3 | ENSMUSG00000026009 |
| OBFC2A        | 1594 | 3 | ENSMUSG00000026107 |
| INPP5D        | 1597 | 3 | ENSMUSG00000026288 |
| CTNNBIP1      | 1654 | 3 | ENSMUSG00000028988 |
| TEC           | 1663 | 3 | ENSMUSG00000029217 |
| ARHGEF6       | 1703 | 3 | ENSMUSG00000031133 |
| PHXR4         | 1711 | 3 | ENSMUSG00000031802 |
| IGF2BP2       | 1730 | 3 | ENSMUSG00000033581 |
| SLC12A8       | 1743 | 3 | ENSMUSG00000035506 |
| ISG15         | 1745 | 3 | ENSMUSG00000035692 |
| ZFHX3         | 1769 | 3 | ENSMUSG00000038872 |
| F13A1         | 1772 | 3 | ENSMUSG00000039109 |
| EDARADD       | 1773 | 3 | ENSMUSG00000039309 |
| 5430411K18RIK | 1784 | 3 | ENSMUSG00000039840 |
| RND2          | 1927 | 2 | ENSMUSG00000001313 |
| GMNN          | 2038 | 2 | ENSMUSG00000006715 |
| NUTF2         | 2053 | 2 | ENSMUSG00000008450 |
| MCOLN2        | 2070 | 2 | ENSMUSG00000011008 |
| ABI3          | 2116 | 2 | ENSMUSG00000018381 |
| KCNAB3        | 2118 | 2 | ENSMUSG00000018470 |
| NLN           | 2232 | 2 | ENSMUSG00000021710 |
| PARP8         | 2234 | 2 | ENSMUSG00000021725 |

|               |      |   |                    |
|---------------|------|---|--------------------|
| BCL6          | 2269 | 2 | ENSMUSG00000022508 |
| YAF2          | 2275 | 2 | ENSMUSG00000022634 |
| SLC29A1       | 2303 | 2 | ENSMUSG00000023942 |
| RSPH1         | 2305 | 2 | ENSMUSG00000024033 |
| LYPD6B        | 2437 | 2 | ENSMUSG00000026765 |
| GPSM1         | 2447 | 2 | ENSMUSG00000026930 |
| DUT           | 2456 | 2 | ENSMUSG00000027203 |
| DRAM2         | 2489 | 2 | ENSMUSG00000027900 |
| EPHB2         | 2529 | 2 | ENSMUSG00000028664 |
| SCARB2        | 2578 | 2 | ENSMUSG00000029426 |
| STRA8         | 2596 | 2 | ENSMUSG00000029848 |
| TRAT1         | 2624 | 2 | ENSMUSG00000030775 |
| ABCB10        | 2675 | 2 | ENSMUSG00000031974 |
| TEX9          | 2682 | 2 | ENSMUSG00000032219 |
| LACTB         | 2687 | 2 | ENSMUSG00000032370 |
| SYDE1         | 2711 | 2 | ENSMUSG00000032714 |
| CDC42EP3      | 2756 | 2 | ENSMUSG00000036533 |
| SYDE2         | 2758 | 2 | ENSMUSG00000036863 |
| ARAP2         | 2785 | 2 | ENSMUSG00000037999 |
| CD84          | 2787 | 2 | ENSMUSG00000038147 |
| ANKRD6        | 2824 | 2 | ENSMUSG00000040183 |
| ZFP704        | 2825 | 2 | ENSMUSG00000040209 |
| 5730559C18RIK | 2846 | 2 | ENSMUSG00000041605 |
| ZFPM1         | 2897 | 2 | ENSMUSG00000049577 |
| SERPINB12     | 2948 | 2 | ENSMUSG00000059956 |
| DHRS3         | 2976 | 2 | ENSMUSG00000066026 |
| GPR174        | 2987 | 2 | ENSMUSG00000073008 |
| SLC7A7        | 3081 | 1 | ENSMUSG00000000958 |
| AIF1L         | 3108 | 1 | ENSMUSG00000001864 |
| DENND1C       | 3125 | 1 | ENSMUSG00000002668 |
| RELB          | 3136 | 1 | ENSMUSG00000002983 |
| HIF3A         | 3169 | 1 | ENSMUSG00000004328 |
| ELOVL1        | 3228 | 1 | ENSMUSG00000006390 |
| CCDC109A      | 3281 | 1 | ENSMUSG00000009647 |
| LAMA5         | 3339 | 1 | ENSMUSG00000015647 |
| NCF1          | 3354 | 1 | ENSMUSG00000015950 |
| HSD11B1       | 3357 | 1 | ENSMUSG00000016194 |
| CENPV         | 3388 | 1 | ENSMUSG00000018509 |
| DDC           | 3452 | 1 | ENSMUSG00000020182 |
| CAMKK1        | 3501 | 1 | ENSMUSG00000020785 |
| SMOC1         | 3532 | 1 | ENSMUSG00000021136 |
| EPC1          | 3792 | 1 | ENSMUSG00000024240 |
| CDX1          | 3833 | 1 | ENSMUSG00000024619 |
| 1110031102RIK | 3886 | 1 | ENSMUSG00000025169 |
| PARP6         | 3894 | 1 | ENSMUSG00000025237 |
| ASB1          | 3984 | 1 | ENSMUSG00000026311 |

|          |      |   |                    |
|----------|------|---|--------------------|
| VIM      | 4027 | 1 | ENSMUSG00000026728 |
| SPEF1    | 4077 | 1 | ENSMUSG00000027329 |
| TCTEX1D1 | 4188 | 1 | ENSMUSG00000028523 |
| FBXO44   | 4240 | 1 | ENSMUSG00000029001 |
| LIMK1    | 4297 | 1 | ENSMUSG00000029674 |
| LDHB     | 4340 | 1 | ENSMUSG00000030246 |
| SYTL2    | 4386 | 1 | ENSMUSG00000030616 |
| SH3GL3   | 4389 | 1 | ENSMUSG00000030638 |
| MSN      | 4434 | 1 | ENSMUSG00000031207 |
| IL2RG    | 4442 | 1 | ENSMUSG00000031304 |
| SLC37A2  | 4518 | 1 | ENSMUSG00000032122 |
| MCAM     | 4520 | 1 | ENSMUSG00000032135 |
| SCN5A    | 4554 | 1 | ENSMUSG00000032511 |
| ZNRF1    | 4599 | 1 | ENSMUSG00000033545 |
| WDR78    | 4659 | 1 | ENSMUSG00000035126 |
| PRICKLE1 | 4686 | 1 | ENSMUSG00000036158 |
| PPFIBP2  | 4698 | 1 | ENSMUSG00000036528 |
| BC022687 | 4739 | 1 | ENSMUSG00000037594 |
| CTNNA1   | 4747 | 1 | ENSMUSG00000037815 |
| DOCK10   | 4793 | 1 | ENSMUSG00000038608 |
| ZC3H12D  | 4842 | 1 | ENSMUSG00000039981 |
| HLCS     | 4874 | 1 | ENSMUSG00000040820 |
| DNALC1   | 4943 | 1 | ENSMUSG00000042523 |
| TMEM229B | 5017 | 1 | ENSMUSG00000046157 |
| PPP1R3B  | 5034 | 1 | ENSMUSG00000046794 |
| BTLA     | 5105 | 1 | ENSMUSG00000052013 |
| SERP2    | 5113 | 1 | ENSMUSG00000052584 |
| REEP1    | 5117 | 1 | ENSMUSG00000052852 |
| PRELID2  | 5181 | 1 | ENSMUSG00000056671 |
| BCL2A1D  | 5348 | 1 | ENSMUSG00000074148 |
| TRBV29   | 5368 | 1 | ENSMUSG00000076480 |

Figure S1-S6

Figure S1

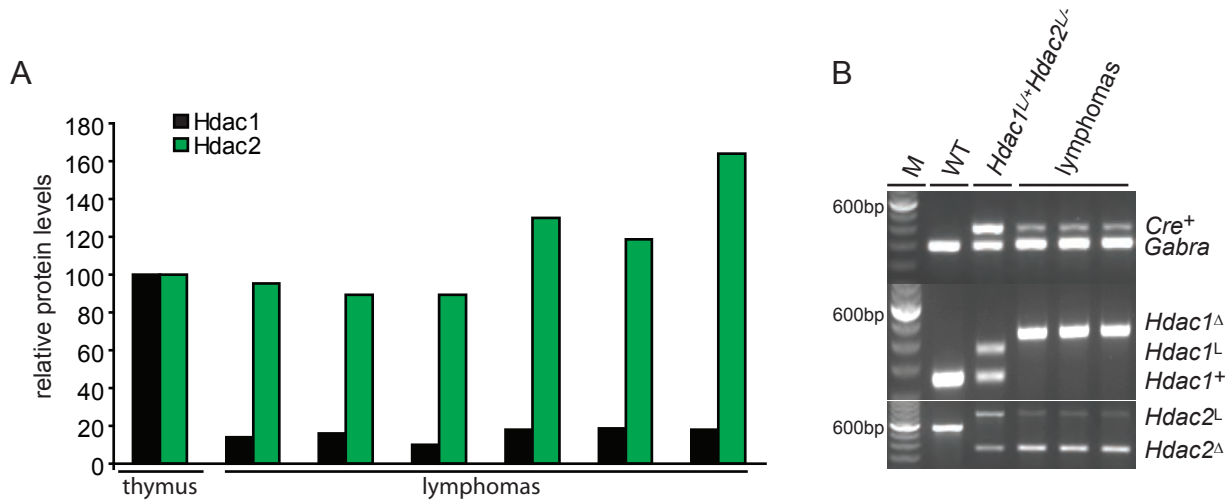

Figure S1. Dosage dependent tumorigenesis in non-induced  $MxCre^+;Hdac1^{L/L};Hdac2^{L/L}$  mice. (A) Quantification of Hdac1 and Hdac2 western blot analysis of *wild type* (WT) thymus and 6 independent lymphomas from non-induced  $MxCre^+;Hdac1^{L/L};Hdac2^{L/L}$  mice.  $\alpha$ -tubulin served as a loading control. Values are relative to Hdac1 and Hdac2 levels in WT thymocytes. (B) PCR genotype analysis of *Hdac1* and *Hdac2* alleles in tumor cell lines derived from lymphomas arising in  $MxCre^+;Hdac1^{L/L};Hdac2^{L/L}$  mice. M indicates 100bp DNA size marker.

Figure S2

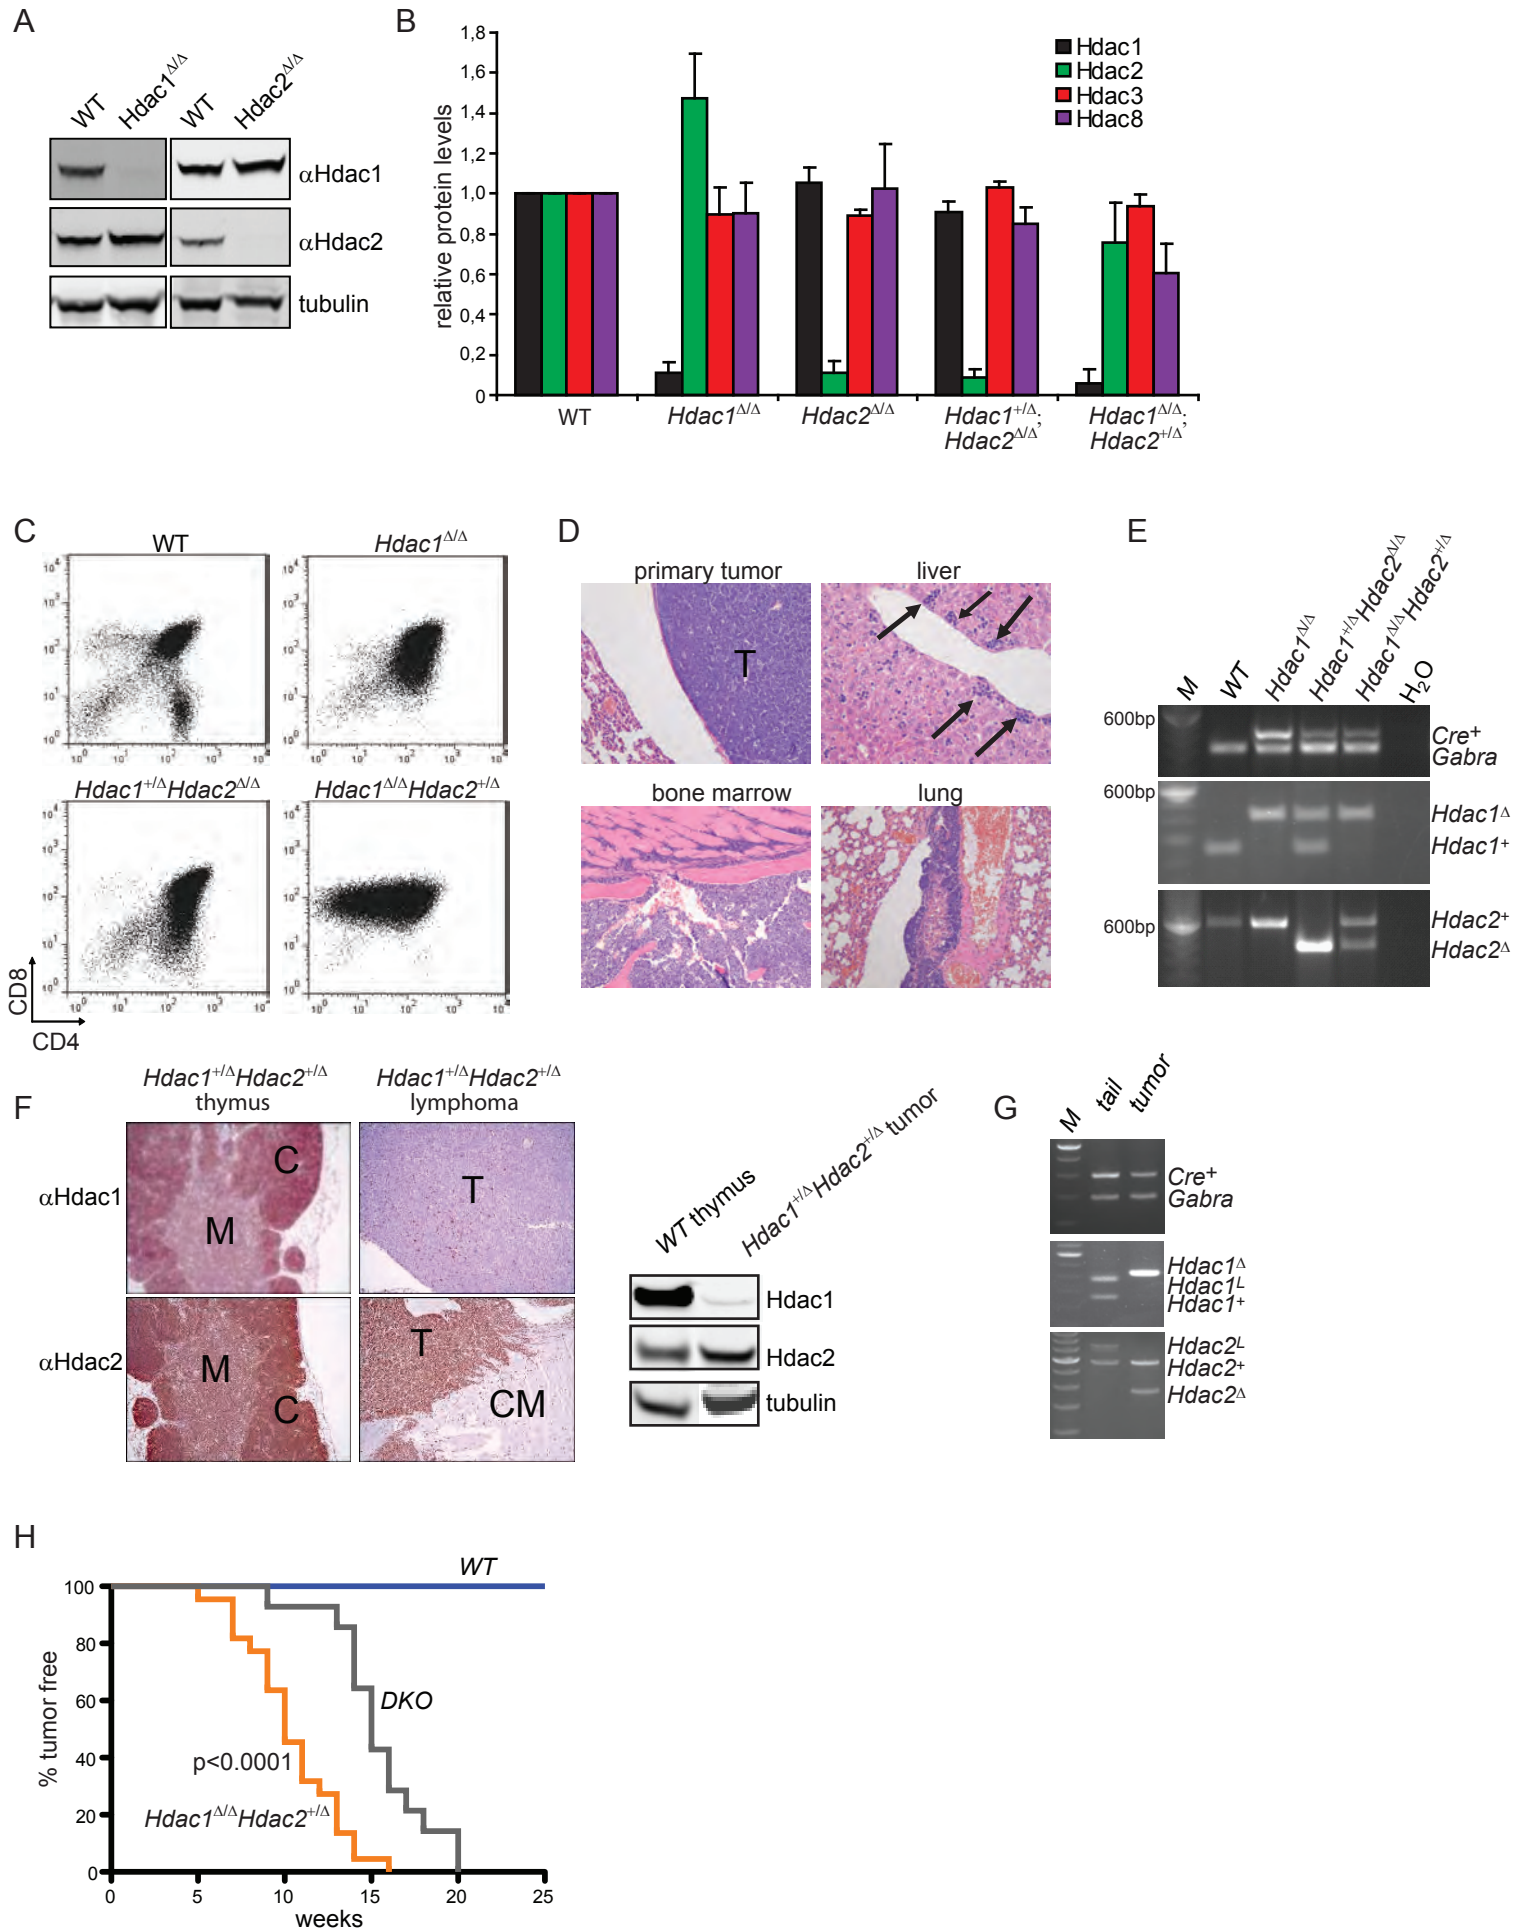



Figure S2. Thymocyte specific deletion of Hdac1 and Hdac2 combinations results in dosage dependent lymphomagenesis. (A) Hdac1 and Hdac2 western blot analysis of *WT*, *LckCre;Hdac1<sup>Δ/Δ</sup>* and *LckCre;Hdac2<sup>Δ/Δ</sup>* thymi.  $\alpha$ -tubulin served as a loading control. (B) Quantitative western blot analysis of protein lysates from thymocytes with indicated genotypes for class I Hdac1, Hdac2, Hdac 3 and Hdac8. Indicated mean values are relative to class I Hdac protein levels in *WT* thymocytes and error bars represent standard deviations of at least three independent thymi per genotype.  $\alpha$ -tubulin served as a loading control. (C) Representative dot plots of a *WT* thymus and thymic lymphomas from mice with indicated genotypes analyzed by flow cytometry using labeled CD4 and CD8 antibodies. (D) Representative pictures of hematoxylin-eosin stained histological sections of a primary *LckCre<sup>+</sup>;Hdac1<sup>Δ/Δ</sup>;Hdac2<sup>+/-Δ</sup>* lymphoma (T), which disseminated to liver (arrows indicate nests of tumor cells next to a major hepatic blood vessel), bone marrow (tumor infiltrating into adjacent muscle tissue) and lung. (E) PCR genotype analysis of *Hdac1* and *Hdac2* alleles in tumor cell lines derived from lymphomas with indicated genotypes. *WT* thymus and no DNA (H<sub>2</sub>O) served as a control. M indicates 100bp DNA size marker. (F) (left panel) Representative pictures of a Hdac1 and Hdac2 immunohistochemical analysis of a *LckCre;Hdac1<sup>+/-Δ</sup>;Hdac2<sup>+/-Δ</sup>* thymus (left) and a lymphoma (right) dissected from a *LckCre;Hdac1<sup>+/-Δ</sup>;Hdac2<sup>+/-Δ</sup>* mouse. C: cortex, M: medulla, T: tumor, CM: cardiac muscle. Magnification: 100x. (right panel) Hdac1 and Hdac2 western blot analysis of a *WT* thymus and from a tumor arising in a *LckCre;Hdac1<sup>+/-Δ</sup>;Hdac2<sup>+/-Δ</sup>* mouse.  $\alpha$ -tubulin served as a loading control. (G) PCR genotype analysis of *Hdac1* and *Hdac2* alleles of *WT* thymus and from a tumor arising in a *LckCre;Hdac1<sup>+/-Δ</sup> Hdac2<sup>+/-Δ</sup>* mouse. (H) Kaplan-Meier tumour free survival plot of *WT*, *LckCre;Hdac1<sup>Δ/Δ</sup>;Hdac2<sup>+/-Δ</sup>* and *DKO* mice. P-value was calculated using a Chi-square test.

Figure S3

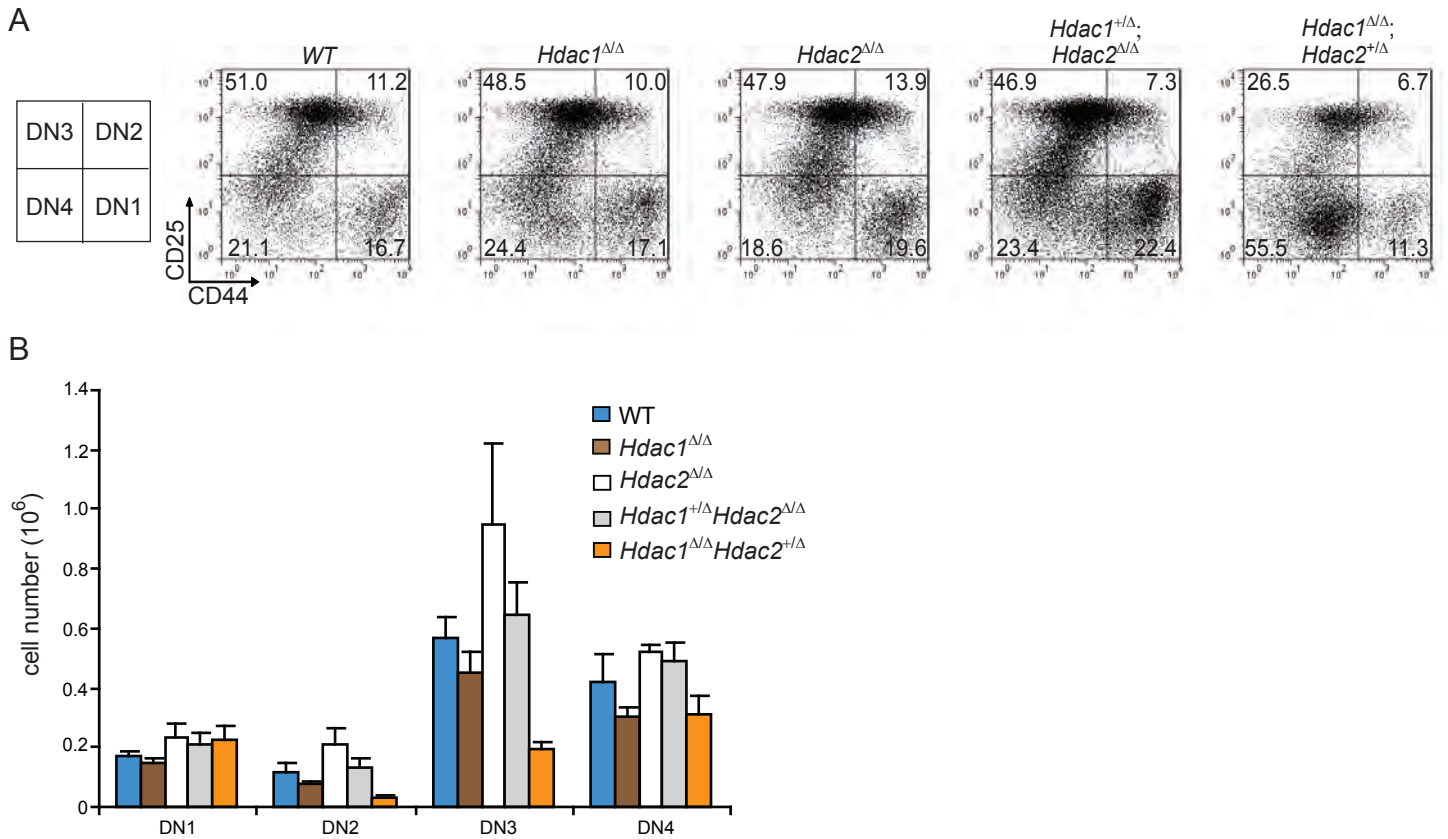

Figure S3. Early thymocyte development in compound Hdac1 and Hdac2 deficient thymocytes. (A) To determine the distribution of early DN thymocytes from mice with indicated genotypes, thymocytes were isolated and stained with labeled antibodies against Thy1, CD4, CD8, CD25, CD44 and analyzed by flow cytometry. Thy1<sup>+</sup>CD4<sup>-</sup>CD8<sup>-</sup> cells were gated and plotted for CD25 and CD44. CD25<sup>-</sup>CD44<sup>+</sup> = DN1; CD25<sup>+</sup>CD44<sup>+</sup> = DN2; CD25<sup>-</sup>CD44<sup>-</sup> = DN3; CD25<sup>+</sup>CD44<sup>-</sup> = DN4. Representative percentages of thymocyte subpopulations are indicated in the quadrants. (B) Absolute numbers of DN1, DN2, DN3 and DN4 thymocyte populations in thymi from mice with indicated genotypes. Error bars indicate standard deviations of at least 3 independent mice per genotype.

Figure S4

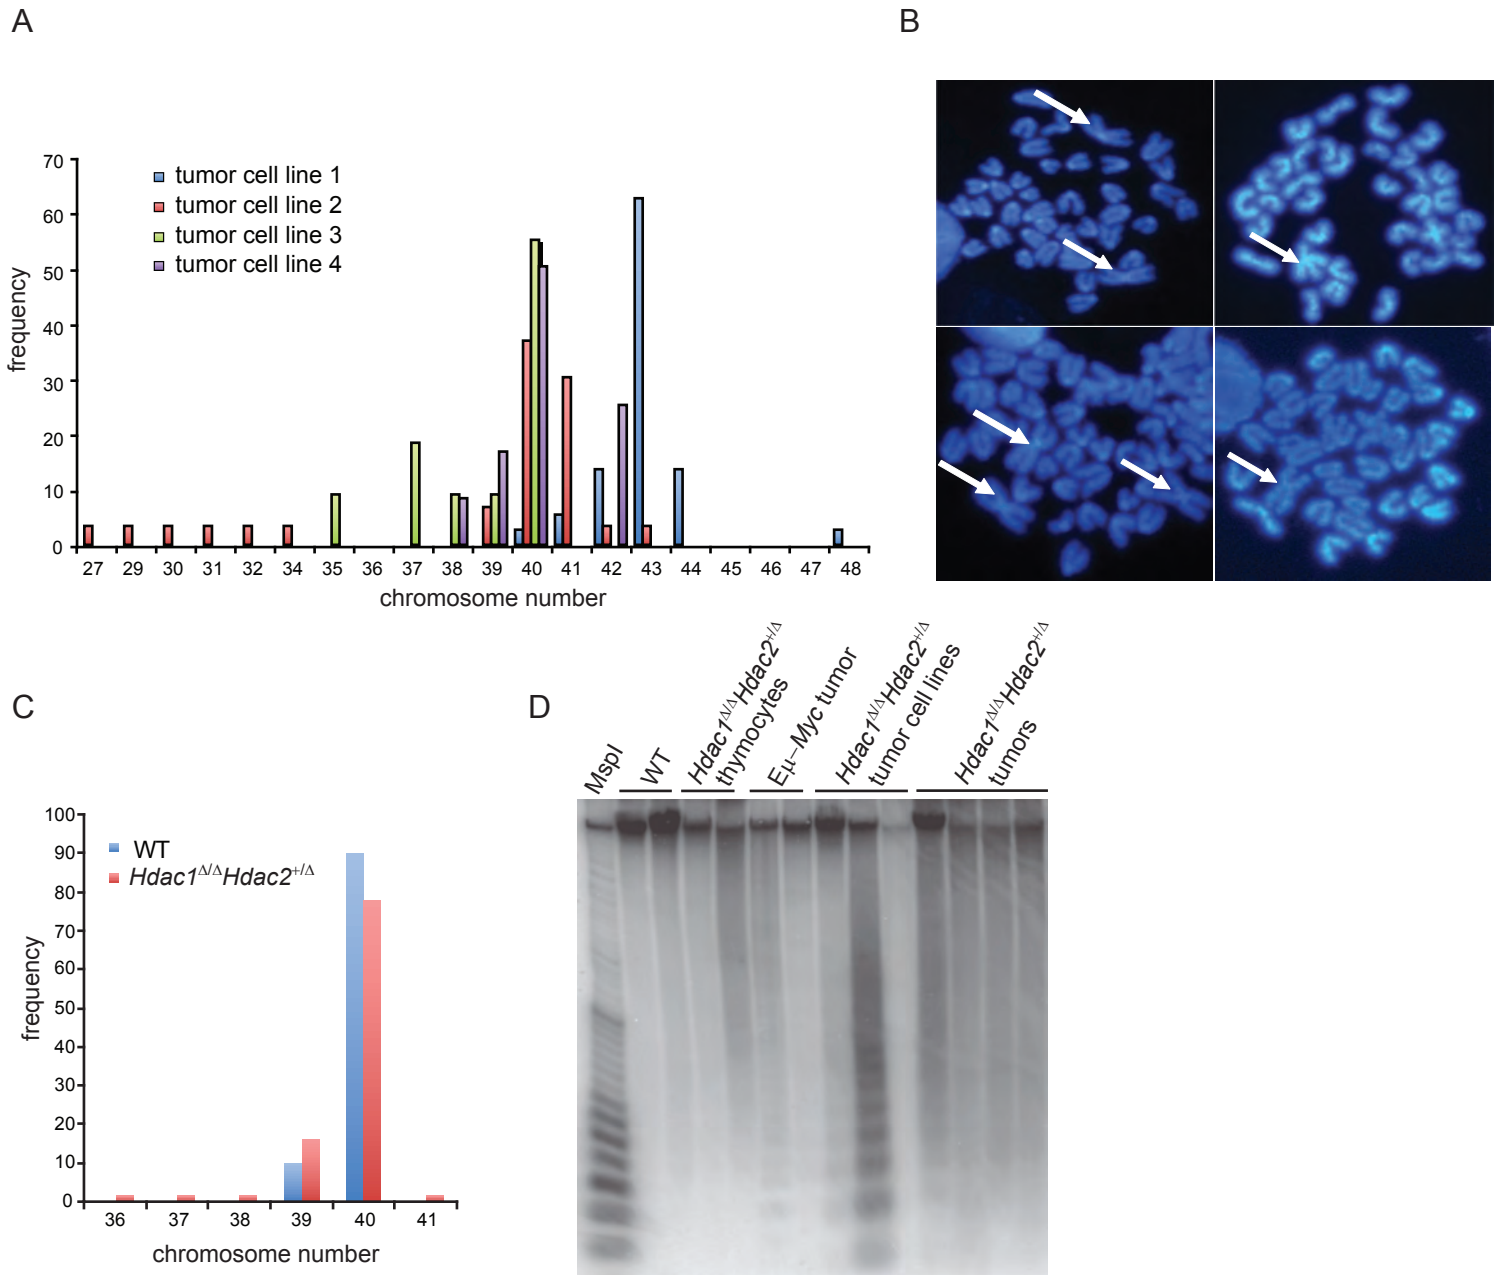

Figure S4. Absence of acute chromosomal instability and centromeric hypomethylation in *LckCre;Hdac1*<sup>ΔΔ</sup>*Hdac2*<sup>+Δ</sup> thymocytes and tumors. (A) Quantification of chromosome number in metaphase spreads from four independent *Hdac1*<sup>ΔΔ</sup>*Hdac2*<sup>+Δ</sup> tumor cell lines indicated a near diploid genome. (B) Representative pictures of metaphase spreads from four independent *Hdac1*<sup>ΔΔ</sup>*Hdac2*<sup>+Δ</sup> tumor cell lines. White arrows indicate centromeric attachment of chromosomes. (C) Average chromosome numbers in metaphase spreads of four independent colcemid treated one week old *WT* and *Hdac1*<sup>ΔΔ</sup>*Hdac2*<sup>+Δ</sup> pre-leukemic thymocyte cultures. (D) Centromeric repeat methylation of *WT* and pre-leukemic *Hdac1*<sup>ΔΔ</sup>*Hdac2*<sup>+Δ</sup> thymocytes, *Eμ-Myc* and *Hdac1*<sup>ΔΔ</sup>*Hdac2*<sup>+Δ</sup> tumor cell lines and *Hdac1*<sup>ΔΔ</sup>*Hdac2*<sup>+Δ</sup> primary tumors analyzed by Southern blot analysis using a probe recognizing centromeric major satellite repeats. Genomic DNA digested with the DNA methylation insensitive *Msp1* restriction enzyme served as positive control.

Figure S5

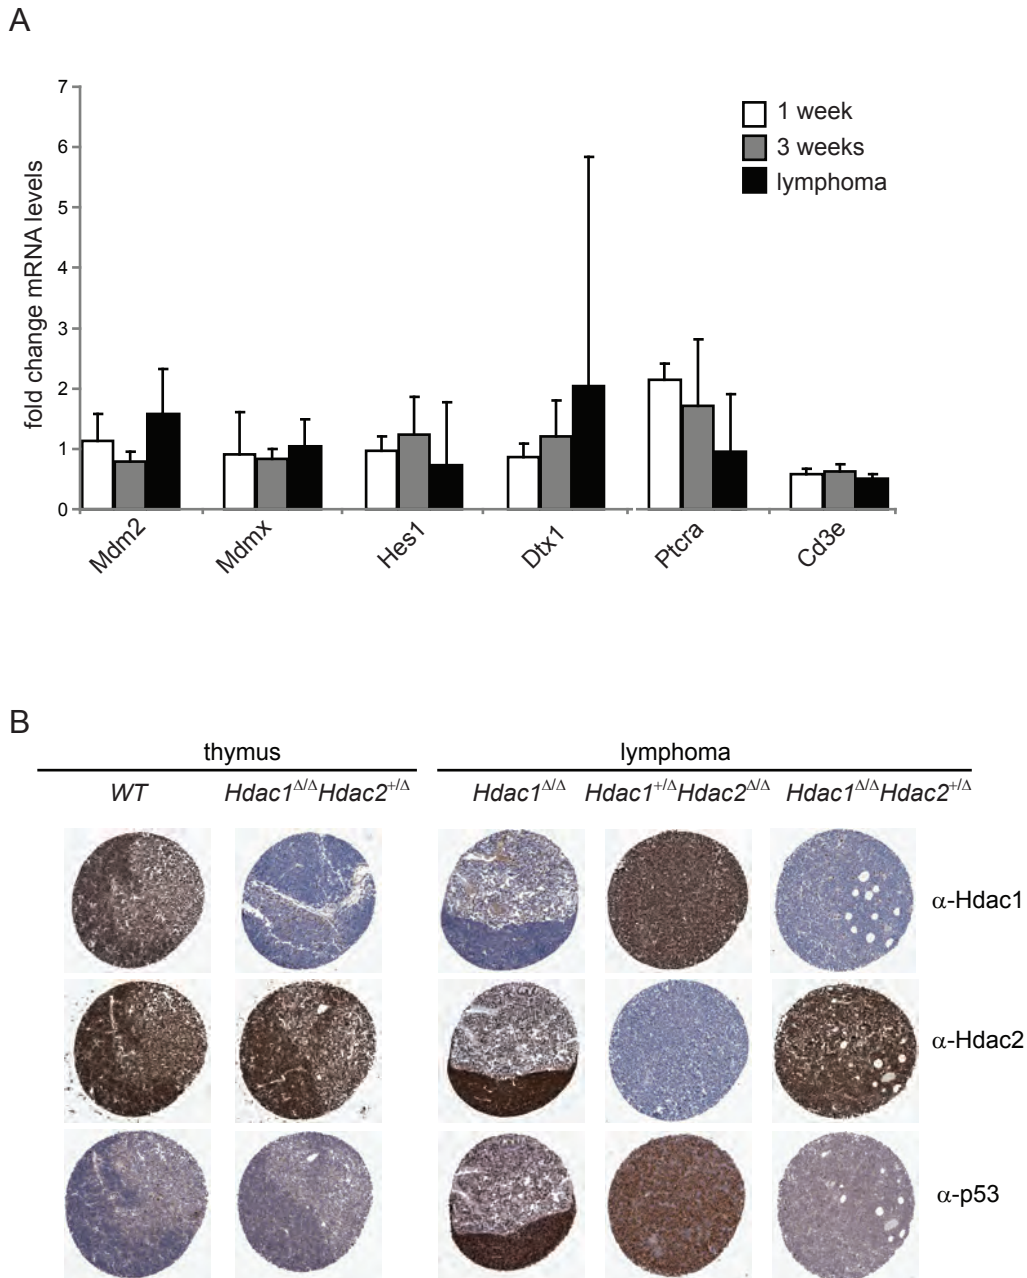

Figure S5. Gradual loss of Hdac1 and Hdac2 results in alleviation of p53 inactivation during lymphomagenesis. (A) Fold changes of p53 regulators *Mdm2* and *Mdmx*, Notch targets *Hes1*, *Dtx1*, *Ptcra* and *Cd3e*, in one and three week old *Hdac1<sup>Δ/Δ</sup>;Hdac2<sup>+/Δ</sup>* thymocytes and *Hdac1<sup>Δ/Δ</sup>;Hdac2<sup>+/Δ</sup>* lymphomas, relative to age-matched wild-type thymi. (B) Representative pictures of immunohistochemical analysis of p53 status in a tissue micro-array containing three weeks old *WT* and *Hdac1<sup>Δ/Δ</sup>;Hdac2<sup>+/Δ</sup>* thymi and *Hdac1<sup>+/Δ</sup>;Hdac2<sup>Δ/Δ</sup>* (n=4) *Hdac1<sup>Δ/Δ</sup>* (n=5) and *Hdac1<sup>Δ/Δ</sup>;Hdac2<sup>+/Δ</sup>* (n= 36) lymphomas. Hdac1 and Hdac2 staining was used to confirm expression status of Hdac1 and Hdac2 in tumors with indicated genotypes.

Figure S6

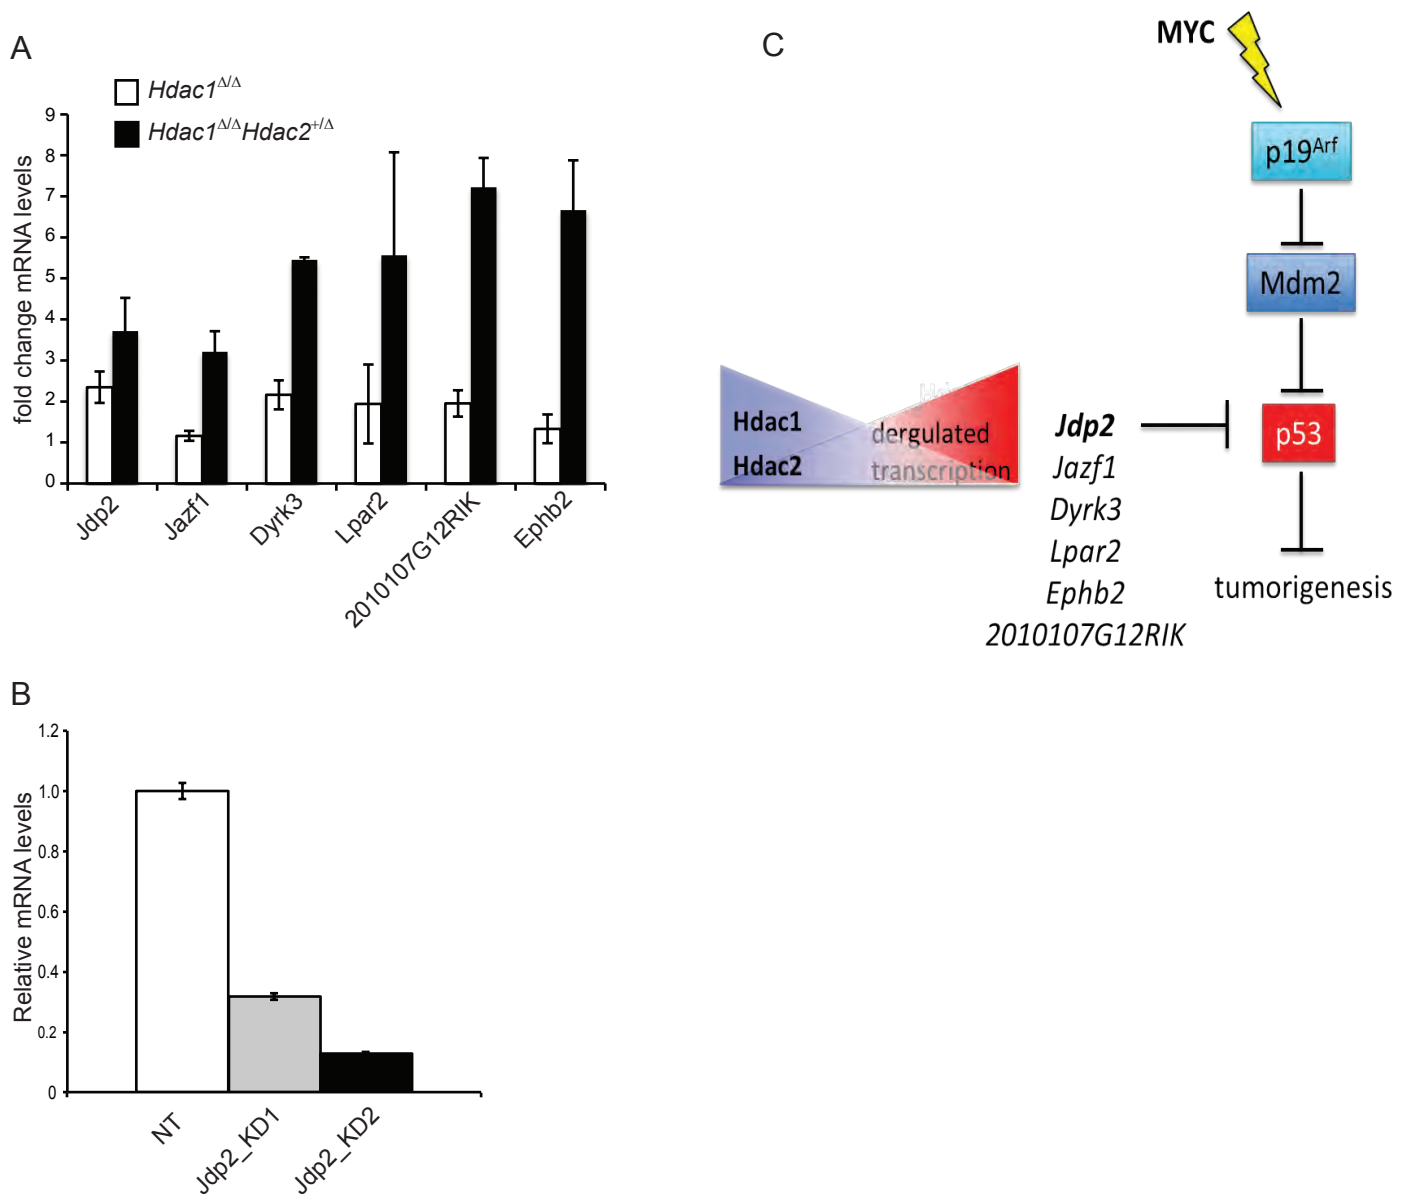

Figure S6. Hdac1 and Hdac2 dosage dependent regulation of p53-suppressing genes. (A) Fold changes in *Jdp2*, *Jazf1*, *Dyrk3*, *Lpar2*, 1190002H23RIK and *Ephb2* in *Hdac1*<sup>ΔΔ</sup> and *Hdac1*<sup>ΔΔ</sup>;*Hdac2*<sup>Δ+/Δ</sup> pre-leukemic thymocytes. (B) Histogram showing *Jdp2* knock-down efficiency determined by qPCR of 2 independent lentiviral shRNA constructs compared to a non-targeting (NT) shRNA construct and normalized by *Gapdh* levels in wild-type MEFs. (C) Working model for Hdac1 and Hdac2 mediated tumor suppression. Hdac1 and Hdac2 collectively regulate expression of numerous genes including Myc-collaborating, p53-suppressing genes in a dosage dependent manner. Partial loss of HDAC1 and HDAC2 results in derepression of *Jdp2*, *Dyrk3* and *Lpar2* among others and causes suppression of the p53-dependent tumor protective pathway unleashing the oncogenic potential of Myc. In addition HDAC1 and HDAC2 may have p53-independent functions in tumor suppression.
